# Supplementary material for: Prevalence of paediatric chronic suppurative otitis media and hearing impairment in rural Malawi: A cross-sectional survey
Source: PLoS One. 2017 Dec 21;12(12):e0188950. doi: 10.1371/journal.pone.0188950 (PMC5739401; doi:10.1371/journal.pone.0188950)
Supplement: S2 Appendix — (XLSX) [file pone.0188950.s002.xlsx]

## Sheet: Village cluster selection
	Village	Random No.
Selected for survey	Kapasule	0.986672
	Mtuwana	0.895634
	Jacob	0.854954
	William	0.843262
	Chikalumpha	0.820757
	Santana	0.937382
	Chadula	0.934272
	Mpangeni	0.889829
	Supuni 2	0.886177
	Fombe	0.865404
Not selected for survey	Ulemu 1, 2, 3	0.811507
	Mwingama	0.786513
	Prova+Mononga	0.761219
	Supuni 1	0.737829
	Lameck	0.735847
	Bello	0.694522
	Njereza	0.576405
	Kabudula 2	0.553156
	Tambo 1	0.535225
	Chikhambi 3	0.461331
	Mafunga	0.450953
	Chikhambi 1	0.441086
	Tsekela+Mwalija	0.392477
	Kanthema	0.392388
	Chinangwa 2	0.156224
	Kabudula 1	0.125117
	Julius 1	0.110936
	Supuni 3	0.103797
	Chikhambi 2	0.0314579
	Lauji 2	0.00387678
	Rauchi	0.857662
	Salumeji	0.849538
	Harrison+Pende	0.801618
	Tambo 2	0.796681
	Julius 2	0.789502
	Mbendelana 2	0.763202
	Lauji 1	0.624103
	Douglas	0.615192
	Mwita	0.589878
	Mbendelana 1	0.490587
	Mvula	0.415974
	Nyamphota	0.266549
	Sisewo	0.248063
	Migano	0.231324
	Chipula	0.155856
	Chinangwa 1	0.13229
	Nedi	0.115252
	Namila	0.0972504
	Ling'awa	0.0847615
	Mederamu	0.0706331

## Sheet: Survey and sampling results
Village Cluster		Total Survey	Total Eligible	Number Requested	Number eligible	Ineligable				Non-Respondant			Number Enrolled	Sampling Fraction	Participation Rate
						Wrong Age	Died	Moved Away	TOTAL	Parent Unreachable	Child did not assent	TOTAL
1		23	23	16	16	0	0	0	0	5	0	5	11	47.8261	68.75
2		19	18	17	16	0	0	1	1	3	4	7	9	50	56.25
3		52	51	34	33	1	0	0	1	6	1	7	26	50.9804	78.7879
4		22	20	17	15	2	0	0	2	3	0	3	12	60	80
5		78	73	52	47	5	0	0	5	4	2	6	41	56.1644	87.234
6		74	67	50	43	5	0	2	7	6	6	12	31	46.2687	72.093
7		92	83	67	58	8	0	1	9	10	2	12	46	55.4217	79.3103
9		111	100	89	78	10	1	0	11	15	4	19	59	59	75.641
10		82	81	53	52	1	0	0	1	8	5	13	39	48.1481	75
8		16	12	14	10	3	0	1	4	2	1	3	7	58.3333	70
Totals		569	528	409	368	35	1	5	41	62	25	87	281	53.2197	76.3587

## Sheet: TM Diagnosis Codes
Tympanic Membrane Diagnosis Codes
0	Unable to assign a diagnosis due to poor image quality
2	AOM
3	OME
4	CSOM
5	Dry Perforation
6	Cerumen Impaction
7	Foreign Body
8	Normal
9	Pars Tensa Retraction
10	Healed Perforation

## Sheet: Survey Data
Study Number	Village Cluster	Age in months	Sex (1=male, 2=female)	Distance from hospital in KM	Number of children <12 years living in the household	Completed pneumococcal conjugate vaccine course (1=yes, 2=no)	Type of cooking appliance used for cooking and heating in household (1=Phillips fan assisted cookstove, 0=open fire)	Mid upper arm circumference in CM	Previous meningitis infection (1=infected, 0=not infected)	Previous measles infection (1=infected, 0=uninfected)	Right ear hearing test result (1=pass, 0=fail)	Left ear hearing test result (1=pass, 0=fail)	Final TM diagnosis Left	Final TM diagnosis Right
699	10	62	2	9	1	1	1	16.6	0	0	1	1	8	8
1000	7	60	1	6	1	1	0	17	0	0	1	1	8	8
1010	7	53	1	6	1	1	1	15	0	0	1	1	8	8
1045	7	61	2	6	2	1	0	15.9	0	0	1	1	8	8
1065	3	61	1	10	1	1	1	15.7	0	0	0	0	3	3
1078	3	52	1	10	2	1	1	17	0	0	1	1	8	8
1083	6	67	1	10	1	1	1	16	0	0	1	1	8	8
1133	1	64	2	12	1	1	1	15	0	0	1	1	8	8
1145	5	49	1	10	1	1	0	16.2	0	0	0	0	8	8
1152	3	69	2	10	0	1	0	15.1	1	0	1	1	8	8
1153	10	60	1	9	1	1	0	14.8	0	0	1	0	2	2
1185	4	48	2	5	1	0	1	15.2	0	0	0	0	8	8
1187	3	57	1	10	2	1	1	16.8	0	0	1	1	8	8
1196	10	77	1	9	1	1	0	16	0	0	1	1	8	8
1207	6	57	1	10	2	1	1	15.5	0	0	1	1	0	0
1219	5	52	2	10	1	1	1	14.4	0	0	1	0	8	8
1311	9	62	2	6	2	1	1	16	0	0	1	0	8	8
1343	7	76	1	6	0	1	0	16.7	1	0	1	1	8	8
1355	9	68	2	6	2	1	0	16.5	0	0	0	0	8	4
1362	7	55	2	6	1	1	0	19.3	0	0	1	1	8	0
1375	6	70	2	10	2	1	0	15.5	0	0	0	1	10	5
1395	9	65	1	6	2	1	1	15.6	0	0	1	1	8	8
1478	9	57	1	6	1	1	0	15.3	0	0	1	1	8	8
1481	10	69	1	9	2	1	0	17.6	0	0	1	1	8	8
1499	6	67	1	10	2	1	0	18	0	0	1	1	8	8
1530	3	61	1	10	1	1	1	14.6	0	0	1	1	8	8
1545	10	74	1	9	1	1	0	15.3	0	0	1	1	8	8
1568	3	49	1	10	1	1	0	15.3	0	0	0	0	0	0
1657	3	57	2	10	3	0	0	15.4	0	0	0	0	0	0
1723	9	72	2	6	0	1	1	17.1	0	1	1	1	8	8
1727	9	50	1	6	1	1	1	15.5	0	0	0	0	8	8
1757	10	56	1	9	2	1	0	14.3	0	0	1	1	8	8
1765	2	63	1	10	2	1	1	14.1	0	0	0	0	0	2
1820	3	61	1	10	0	1	1	15.5	0	0	0	0	8	10
1826	5	70	2	10	3	0	0	14.8	0	0	1	1	8	8
1848	9	57	1	6	0	1	0	15	0	0	0	1	6	8
1886	9	63	1	6	2	1	0	16.3	0	0	1	1	0	8
1939	5	59	1	10	0	1	1	14.5	0	0	1	1	8	8
2022	7	53	1	6	0	1	1	15.5	0	0	0	1	8	8
2039	9	70	1	6	1	1	0	15.4	0	0	1	1	8	8
2050	3	49	1	10	3	1	1	15	0	0	1	1	6	6
2091	9	77	2	6	4	1	0	15.2	0	0	1	1	8	8
2092	10	57	2	9	0	1	0	14.4	0	0	1	1	8	8
2139	7	62	1	6	0	1	1	15.5	0	0	1	1	8	8
2166	5	63	1	10	1	1	1	14.4	0	0	1	1	6	8
2182	9	58	1	6	1	1	0	14.6	0	0	1	1	8	8
2196	9	57	1	6	2	1	1	15.9	0	0	1	1	8	8
2237	9	83	2	6	1	1	0	15.8	0	0	1	1	8	8
2280	5	62	2	10	0	1	0	15.2	0	0	1	1	8	8
2288	6	69	1	10	1	1	0	15	0	0	1	1	8	8
2290	6	67	2	10	2	1	1	17.1	0	0	1	1	8	8
2364	6	76	1	10	2	0	0	16.5	0	0	1	1	8	8
2375	1	60	1	12	0	1	1	15.5	0	0	1	1	8	8
2502	10	56	1	9	1	1	0	14.6	0	0	0	0	8	8
2505	3	65	2	10	2	1	1	14.7	0	0	1	1	2	2
2537	3	54	1	10	1	1	0	15.9	0	0	1	1	8	8
2539	5	71	2	10	2	1	0	16.8	0	0	0	1	8	8
2563	5	71	2	10	2	1	0	16.3	0	0	1	1	8	8
2588	9	55	1	6	0	1	1	14.5	0	0	1	1	8	8
2665	9	48	2	6	1	1	1	16.8	0	0	0	1	8	2
2681	9	65	1	6	0	1	1	14.4	0	0	0	1	8	4
2703	1	64	1	12	1	0	0	15.5	0	0	1	0	0	6
2743	9	52	1	6	1	1	0	15.1	0	0	1	1	8	8
2758	9	72	2	6	1	1	0	15.6	0	0	1	0	4	6
2863	6	76	1	10	1	1	0	13.4	0	0	1	1	8	8
2887	7	53	1	6	1	1	0	16	0	0	1	1	10	10
2928	9	69	1	6	2	1	0	14.2	0	0	1	1	8	8
2994	9	57	2	6	1	1	1	14	0	0	1	1	6	8
3002	10	65	2	9	1	1	0	13	0	0	0	0	8	6
3049	4	65	2	5	2	1	1	17.5	0	0	1	1	8	6
3070	4	48	1	5	0	1	1	14.6	0	0	1	1	8	8
3072	2	64	1	10	1	1	0	15.3	0	0	1	1	8	8
3079	7	63	2	6	3	1	0	17.5	0	0	0	1	8	8
3115	10	59	2	9	2	1	1	16.7	0	0	1	1	8	8
3128	9	54	2	6	1	1	0	15.1	0	0	0	0	10	0
3148	10	72	1	9	2	1	0	17.1	0	0	0	0	3	3
3181	10	60	1	9	1	1	1	16	0	0	1	1	8	8
3241	3	52	1	10	1	1	1	16	0	0	1	1	8	8
3294	1	49	2	12	2	1	0	17	0	0	1	1	8	8
3295	7	68	2	6	1	1	0	16.5	0	0	1	1	8	8
3352	3	65	2	10	1	1	1	17.3	0	0	1	1	8	8
3365	5	54	2	10	2	1	0	14.8	0	0	1	1	8	8
3366	1	76	2	12	5	1	1	14.3	0	0	1	0	8	8
3428	9	54	1	6	1	1	0	16.1	0	0	1	1	8	8
3429	5	69	1	10	2	1	1	15.8	0	0	1	1	8	8
3444	5	74	1	10	1	1	0	16.2	0	0	1	0	4	8
3459	4	67	1	5	2	1	1	14.8	0	0	1	1	6	6
3463	8	64	1	16	0	1	0	21	0	0	1	1	8	8
3467	7	65	1	6	1	1	0	15.3	0	0	1	1	8	8
3475	7	62	1	6	0	1	0	14.4	0	0	1	0	8	8
3487	10	57	1	9	2	1	1	16.3	0	0	1	1	8	8
3514	10	57	2	9	1	1	1	16.7	0	0	0	0	8	6
3539	10	77	2	9	3	1	1	19	0	0	1	1	8	10
3545	8	59	2	16	0	0	0	15	0	0	1	1	8	8
3600	3	60	2	10	2	1	0	16.3	0	0	1	1	8	8
3608	7	51	1	6	3	1	0	14.7	0	0	0	0	8	8
3706	9	70	2	6	2	1	1	15.5	0	0	1	1	8	8
3708	5	48	2	10	2	1	1	14.5	0	0	1	1	8	8
3717	9	60	1	6	1	1	0	15.5	0	0	0	0	0	6
3766	9	64	1	6	2	1	1	14	0	0	1	1	8	8
3864	7	62	2	6	1	1	1	15.3	0	0	1	1	8	8
3882	5	62	2	10	2	1	1	14.5	0	0	0	1	6	6
3938	10	51	1	9	3	1	1	16.5	0	0	1	1	8	8
4049	5	67	1	10	2	1	1	14.8	0	0	1	1	8	8
4061	4	65	1	5	2	1	1	14.5	0	0	1	0	4	8
4083	5	58	1	10	2	1	1	16	0	0	1	1	8	10
4101	5	48	2	10	2	1	1	13.5	0	0	1	0	8	8
4211	6	56	1	10	3	1	0	15	0	0	0	0	4	4
4298	9	71	1	6	2	1	1	14.3	0	0	0	1	8	8
4317	5	64	1	10	2	1	1	15.2	0	0	1	1	8	8
4380	6	64	2	10	2	1	0	14.8	0	0	1	1	8	6
4389	7	50	2	6	1	1	0	17	0	0	1	1	8	6
4391	6	77	2	10	1	1	1	17.3	0	0	1	1	4	4
4455	7	61	1	6	2	1	1	15.3	0	0	1	1	6	6
4486	5	75	1	10	1	1	0	15.6	0	0	1	1	8	8
4523	7	52	1	6	1	1	0	14.4	0	0	1	1	8	8
4625	5	51	2	10	2	1	0	15	0	0	1	1	0	8
4681	5	72	1	10	1	1	1	16	0	0	1	1	8	8
4727	9	50	1	6	2	1	0	15.2	0	0	1	1	8	8
4733	6	57	2	10	2	1	1	16	0	0	1	1	8	8
4773	2	58	2	10	1	1	0	14.9	0	0	1	1	8	6
4782	7	52	1	6	0	1	1	15.5	0	0	1	1	8	8
4808	4	65	1	5	0	1	1	15.1	0	0	1	1	3	2
4826	9	60	1	6	3	1	1	14.9	0	0	0	1	3	8
4873	1	48	1	12	2	1	0	16.2	0	0	1	1	8	8
4909	6	62	2	10	0	1	1	17.3	0	0	1	1	6	8
4933	10	60	2	9	1	1	0	14.9	0	0	1	1	8	8
4955	3	64	1	10	1	1	1	16.5	0	0	1	1	8	8
4974	9	58	1	6	1	1	0	16.4	0	0	1	1	8	8
4988	6	64	2	10	1	1	1	15.5	0	0	1	1	8	6
5004	1	75	2	12	2	1	0	17	0	0	0	1	8	8
5082	6	58	2	10	1	1	1	13.5	0	0	1	1	6	8
5095	5	55	2	10	1	1	1	16	0	0	1	1	8	8
5096	5	64	1	10	2	1	1	16	0	0	1	1	8	8
5102	9	79	2	6	1	1	1	16.4	0	0	1	1	8	8
5137	6	72	1	10	2	1	1	15.6	0	0	1	1	6	8
5139	1	52	2	12	2	1	1	16	0	0	0	0	8	0
5198	7	55	2	6	1	1	0	15	0	0	1	1	8	8
5208	9	49	1	6	0	1	0	15.2	0	0	1	1	8	8
5209	6	52	2	10	2	1	0	17.1	0	0	1	1	8	8
5220	2	62	1	10	2	1	1	14.9	0	0	1	1	8	8
5277	10	58	2	9	2	1	0	17.6	0	0	0	1	0	0
5297	7	70	2	6	2	1	0	15	0	0	1	1	6	8
5308	9	60	1	6	2	1	1	15	0	0	1	1	8	8
5337	1	65	2	12	2	1	1	17.3	0	0	1	1	8	8
5392	2	50	1	10	1	1	1	16	0	0	0	0	8	8
5399	9	65	1	6	3	1	0	15.8	0	0	1	1	8	8
5409	6	51	2	10	1	1	0	15.2	0	0	1	1	8	8
5411	10	54	1	9	2	1	1	15.6	0	0	1	1	7	8
5470	9	76	1	6	1	1	0	17	0	1	1	1	8	8
5475	2	51	2	10	0	1	1	14.5	0	0	0	0	8	8
5488	7	55	2	6	0	1	0	14.5	0	0	1	1	8	0
5513	9	50	2	6	1	1	1	15.3	0	0	1	1	8	8
5535	6	76	2	10	1	1	1	17	0	1	1	1	8	8
5592	8	50	1	16	1	1	0	19	0	0	1	1	8	8
5616	5	50	2	10	1	1	1	14.7	0	0	1	1	8	8
5650	9	50	1	6	0	1	0	15.2	0	0	1	1	8	8
5675	7	48	1	6	1	1	0		0	0	1	1	8	8
5679	5	53	2	10	1	1	0	15.5	0	0	0	0	9	6
5703	9	72	1	6	2	1	1	16.7	0	0	1	1	8	8
5837	3	79	1	10	1	1	0	15.5	1	1	0	0	4	4
5860	5	52	1	10	0	1	1	14.4	0	0	1	1	10	8
5918	2	51	1	10	2	1	0	15	0	0			6	6
5931	7	70	1	6	0	1	0	17.6	0	0	1	1	8	8
6038	9	59	2	6	2	1	0	18	0	0	1	1	8	8
6048	9	69	2	6	1	1	0	16	0	0	0	0	8	8
6063	4	75	1	5	0	1	1	16.2	0	1	1	1	8	6
6068	10	52	2	9	1	1	1	16.2	0	0	1	1	8	8
6080	5	64	2	10	1	1	1	18.8	0	0	1	1	8	8
6099	10	55	1	9	2	1	0	16.6	0	0	1	1	8	8
6116	4	50	1	5	0	1	0	15.9	0	0	1	1	8	8
6153	7	60	1	6	1	1	0	16	0	0	1	1	8	8
6166	6	63	1	10	1	1	0	15.5	0	0	1	1	8	8
6181	1	64	1	12	5	1	1	15.7	0	0	1	1	8	6
6196	7	78	2	6	1	1	0	17	0	0	1	1	8	8
6207	2	55	2	10	2	1	0	14.2	0	0	1	1	8	8
6212	8	63	2	16	2	1	1	18	0	0	1	1	8	8
6274	5	59	2	10	1	1	0	17.3	0	0	1	1	8	8
6277	10	55	1	9	1	1	1	16.3	0	0	0	0	8	8
6289	7	55	2	6	1	1	0	15.2	0	0	0	0	6	8
6343	7	54	1	6	3	1	0	16.3	0	0	1	1	8	8
6356	9	71	2	6	2	1	0	15.6	0	0	1	1	8	8
6373	7	67	1	6	2	1	1	13.5	0	0	1	1	8	8
6419	3	58	2	10	2	1	1	15.4	0	1	1	1	6	8
6445	7	73	2	6	1	1	1	17.3	0	0	1	1	8	8
6452	7	72	2	6	1	1	1	15.5	0	0	1	1	8	8
6500	3	52	2	10	2	1	1	15	0	0	1	1	8	8
6529	7	65	1	6	1	0	1	15.4	0	0	1	1	8	8
6537	4	57	1	5	2	1	1	14.2	0	0	1	1	4	8
6604	3	64	1	10	1	1	1	16.5	0	0	1	1	8	8
6620	5	66	1	10	1	1	1	15.5	0	0	1	1	8	8
6670	10	76	2	9	1	1	1	15.6	0	0	1	1	8	8
6693	1	52	2	12	4	1	1	16	0	0	1	1	8	8
6705	9	68	2	6	2	1	0	15.4	0	0	1	1	8	8
6751	9	62	1	6	1	1	0	15.3	0	0	1	1	8	8
6775	2	55	1	10	3	1	1	14.8	0	0	1	1	8	8
6805	9	77	2	6	2	1	1	16.4	0	0	1	0	9	9
6825	5	76	1	10	1	1	0	15.2	0	0	0	0	8	8
6854	7	65	2	6	1	1	1	16	0	0	1	0	8	8
6858	9	60	1	6	1	1	1	15.4	0	0	1	1	4	8
6861	3	52	2	10	2	1	1	15	0	0	1	0	8	8
6920	8	55	1	16	2	1	1	17.5	0	0	1	1	8	6
6939	6	69	2	10	1	1	1	16.2	0	0	1	1	8	8
7043	10	48	2	9	0	1	1	17	0	0	0	0	8	8
7062	9	67	2	6	3	1	1	16	0	0	0	1	10	4
7085	7	69	1	6	3	1	1	16.4	0	0	1	1	8	8
7111	6	76	2	10	1	1	1	16.5	0	0	1	1	8	8
7144	7	69	2	6	1	1	1	17.2	0	0	1	1	4	8
7160	3	65	2	10	0	1	0	14.6	0	0	1	1	0	0
7238	3	67	2	10	2	1	1	15.5	0	0	1	1	8	8
7295	9	60	2	6	1	1	0		0	0	1	1	8	8
7348	9	58	2	6	2	1	0	14.4	0	0	1	1	8	2
7355	10	50	2	9	1	1	1	15.9	0	0	1	1	8	8
7360	3	77	1	10	1	1	1	14.9	0	0	1	1	8	8
7371	6	60	1	10	2	1	1	15.8	0	0	1	1	8	8
7383	6	58	2	10	1	1	0	17	0	0	1	1	8	8
7426	6	70	2	10	2	1	1	15.5	0	0	1	1	8	8
7511	6	65	1	10	2	1	1	16.5	0	0	1	1	6	6
7735	6	51	2	10	2	1	1	16	0	0	0	0	8	8
7781	10	60	1	9	2	0	0	14.5	0	0	1	1	6	6
7800	10	56	1	9	2	1	1	14.3	0	0	1	1	6	6
7811	5	59	2	10	2	1	1	15.1	0	0	1	1	8	8
7860	8	58	1	16	2	1	1	14.5	0	0	1	1	8	8
7903	10	71	1	9	2	1	1	14.6	0	0	1	1	4	9
8002	7	69	2	6	1	1	0	16	0	0	1	1	8	8
8011	7	54	2	6	2	1	1	15.4	0	0	1	1	8	8
8016	8	55	1	16	2	1	0	17.1	0	0	1	1	8	8
8061	10	72	2	9	2	1	0	16.3	0	0	0	0	8	8
8075	9	70	1	6	0	1	0	15.6	0	0	1	1	8	8
8076	6	49	2	10	1	1	0	17.1	0	0	1	1	8	8
8100	7	64	1	6	2	1	0	16	0	0	1	1	8	8
8136	5	50	1	10	1	1	1	13.6	0	0	0	0	8	8
8197	5	75	2	10	1	1	1	16.3	0	0	1	1	8	6
8217	5	75	2	10	2	1	1	16.3	0	0	1	1	8	8
8226	10	62	1	9	2	1	1	17	0	0	1	0	3	8
8262	10	55	1	9	1	1	0	15	0	0	1	1	8	8
8416	7	55	2	6	1	1	0	17.5	0	0	0	0	4	6
8483	5	76	2	10	1	1	1	16.4	0	0	1	1	8	8
8515	10	67	1	9	2	1	0	17.8	0	0	1	0	3	8
8517	7	58	1	6	0	1	1	14.4	0	0	1	0	4	4
8594	7	50	2	6	0	1	1	14.5	0	0	0	0	8	8
8603	4	70	1	5	2	0	1	15	0	0	1	1	8	8
8619	10	71	1	9	1	1	1	15.9	0	0	1	1	8	8
8630	5	58	2	10	3	1	1	16.8	0	0	1	1	8	8
8673	7	57	1	6	1	1	0	16.4	0	0	1	1	8	8
8679	10	69	1	9	1	1	1	16.8	0	0	1	1	8	8
8706	10	66	1	9	0	0	1	15	0	0	1	1	8	8
8743	10	59	1	9	2	1	1	14.4	0	0	1	1	8	8
8770	5	62	2	10	2	1	1	14.2	0	0	1	1	8	8
8799	9	77	1	6	1	1	0	15.6	0	0	1	1	8	6
8916	9	50	2	6	2	1	1	16.4	0	0	1	1	8	8
8968	9	72	1	6	1	1	1	15.6	0	0	1	1	8	8
8997	5	64	1	10	1	1	0	14.7	0	0	1	1	8	6
9052	9	51	1	6	2	1	1	15.6	0	0	1	1	8	8
9060	5	71	2	10	3	1	0	15.4	0	0	1	1	8	8
9072	7	70	2	6	2	1	0	15	0	0	1	1	8	8
9105	3	76	2	10	1	1	1	16	0	0	1	1	8	8
9110	3	65	1	10	2	1	1	14.1	0	0	1	0	10	10
9124	9	51	2	6	1	1	1	17.1	0	0	1	1	6	8
9209	9	74	2	6	1	1	1	14.5	0	1	1	1	8	8
9216	9	50	1	6	1	1	0	17.1	0	0			8	8
9218	9	65	2	6	2	1	0	15.5	0	0	1	1	8	8
9221	3	71	1	10	2	1	0	15.1	0	0	1	1	8	8
9229	9	65	2	6	2	1	0	15	0	0	1	1	8	8
9266	4	62	1	5	2	1	1	13.9	0	0	1	0	8	8
9370	5	74	2	10	2	1	0	18	0	0	1	1	8	8
9415	7	60	1	6	1	1	0	14.7	0	0	1	1	8	8
9448	7	54	1	6	1	1	0	17	0	0	1	1	8	6
9473	9	65	2	6	1	1	1	14.2	0	0	1	1	6	6
9587	4	71	2	5	0	1	0	15.2	0	0	1	1	8	8
9589	6	67	1	10	3	1	0	15	0	0	1	1	2	3
9641	9	67	1	6	2	0	0	16.2	0	0	1	1	8	8
9648	10	70	2	9	1	1	1	17.6	0	0	1	1	8	8
9671	5	48	2	10	0	1	1	13	0	0	1	1	8	8
9743	7	48	2	6	1	1	0	16.6	0	0	1	1	8	8
9750	10	50	1	9	2	1	1	16.5	0	0	1	1	8	8
9777	6	56	2	10	3	1	0	15.5	0	0	1	1	6	6
9820	5	71	1	10	1	1	1	14.2	0	0	1	1	8	8
9852	7	51	1	6	1	1	0	18.5	0	0	1	1	8	8
9893	10	56	1	9	0	1	1	14.7	0	0	0	1	2	2
9924	6	61	1	10	1	1	0	15	0	0	1	1	8	6
